# Supplementary material
Source: PubMed Central journal article supplement (PMC8286284)
Supplement: NIHMS1673224-supplement-efigure.pdf [file NIHMS1673224-supplement-efigure.pdf]

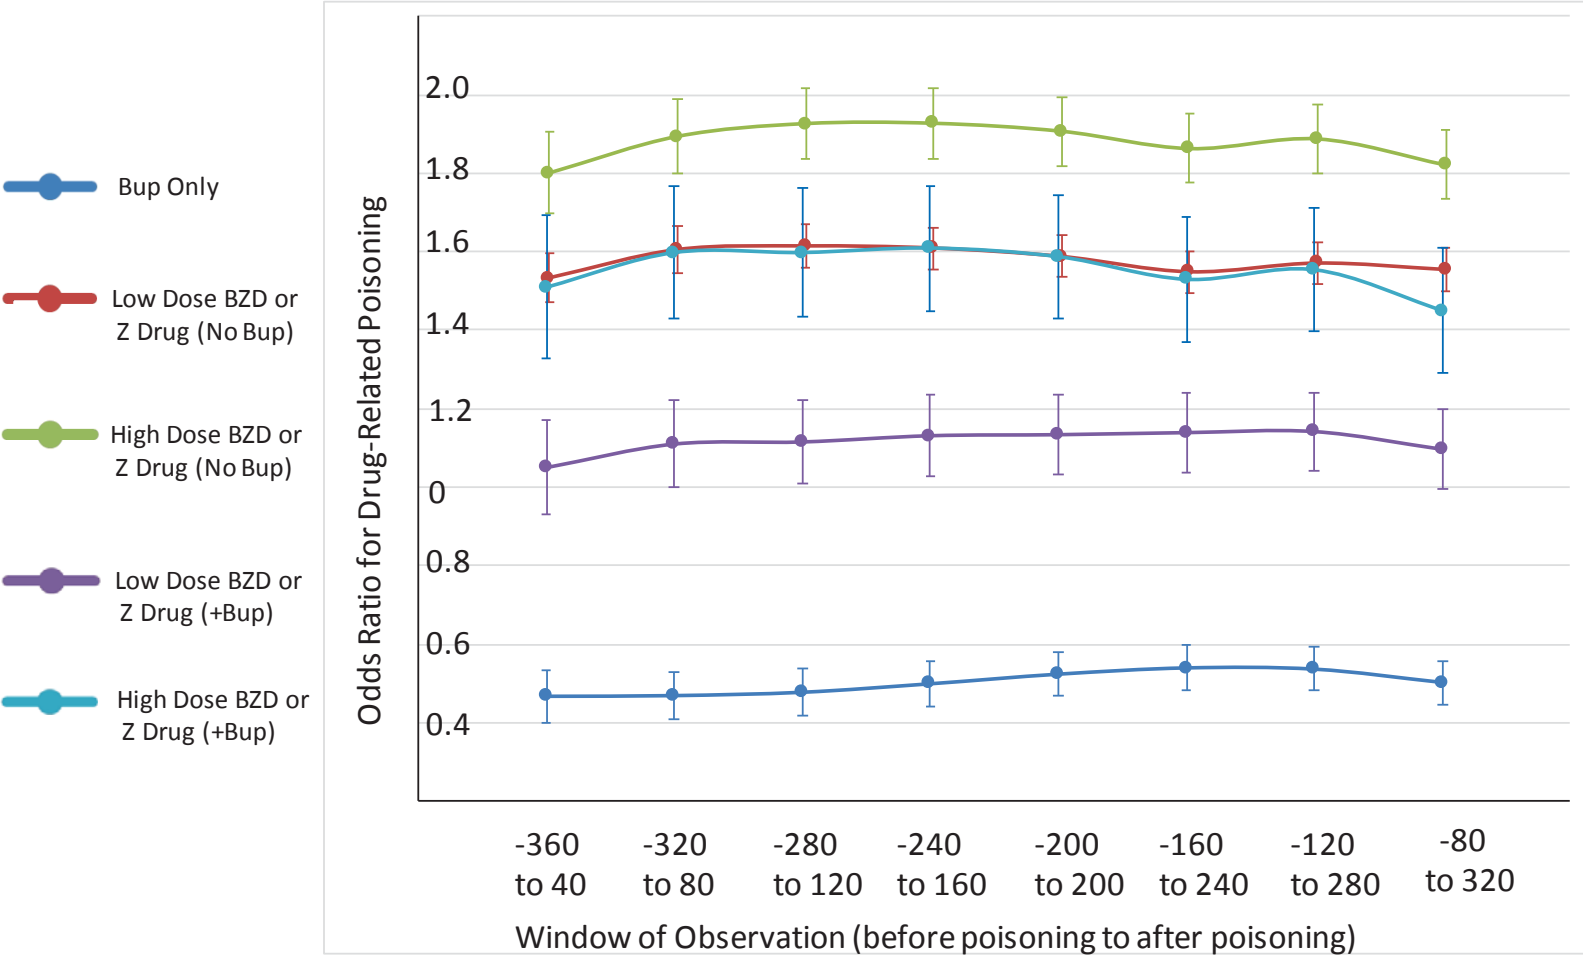

**eFigure 1. Time varying, multiple-window sensitivity analysis for interaction between benzodiazepine and buprenorphine on drug-related poisonings (Model 10, Table 3)**
